# Supplementary material
Source: PubMed Central journal article supplement (PMC4216741)

## Holo-retinol-binding protein and its receptor STRA6 drive oncogenic transformation

Daniel C. Berry, Liraz Levi, and Noa Noy

### Supplemental Figures

**Figure S1. a, b)** Levels of STRA6 mRNA in samples of normal human breast and invasive breast carcinoma in two independent studies {Richardson, 2006 #2424}{Zhao, 2004 #2421}.

Data were obtained from Oncomine™ (Compendia Bioscience, Ann Arbor, Michigan). \* $p < 0.05$ .

**c, d)** Levels of STRA6 mRNA in samples of normal colon and colon carcinoma in two independent studies ({Hong, 2010 #2451}{Kaiser, 2007 #2426} Oncomine™). \* $p < 0.05$ . **e)**

Levels of RBP mRNA in the 4T1 isogenic mouse cell line models of breast cancer, 67NR, 4T07, and 4T1, measured by Q-PCR. Mean±S.E.M. (n=3), # $p < 0.001$  vs. 67NR cells. **f, g)** Levels of

RBP mRNA in samples of normal colon and colon carcinoma in two independent studies ({Hong, 2010 #2451}{Kaiser, 2007 #2426} Oncomine™). \* $p < 0.05$ .

**Figure S2. a)** 24 h. BrdU incorporation in SW480 cells stably expressing GFPshRNA or two different STRA6shRNAs. Mean±S.E.M. (n=3). Inset: STRA6 mRNA in cells stably expressing

lentiviral vectors encoding GFPshRNA, or the STRA6shRNA constructs TRCN0000128799 or TRCN0000129158 (Open Biosystems). **b)** Growth of MCF-7 cells expressing an empty vector

(e.v.) or vector encoding STRA6shRNA. Cells were treated with vehicle or with 1  $\mu$ M holo-RBP. Ligand was replenished every 24 h. Mean±S.E.M. (n=3), \*\* $p < 0.03$  vs. vehicle-treated

cells, ## $p < 0.01$  vs. e.v.-expressing, vehicle-treated cells. **c)** 24 h. BrdU incorporation in MCF-7 cells expressing e.v. or vector encoding STRA6shRNA treated with vehicle or 1  $\mu$ M holo-RBP.

Mean±S.E.M. (n=3), \*\* $p < 0.03$  vs. vehicle-treated cells. Inset: immunoblots demonstrating

downregulation of STRA6 in MCF-7 cells. **d**) Migration assays using MCF-7 cells expressing e.v. or vector encoding STRA6shRNA treated with vehicle or 1  $\mu$ M holo-RBP for 12 h. Mean $\pm$ S.E.M. (n=3), \*\*p<0.03 vs. e.v.-expressing, vehicle-treated cells. ##p<0.01 vs. e.v.-expressing, vehicle-treated cells. **e**) 24 h. BrdU incorporation in SW620 cells expressing e.v. or STRA6-shRNA and treated with 1  $\mu$ M holo-RBP. Mean $\pm$ S.E.M. (n=3), \*p<0.01 vs. vehicle-treated cells. Inset: immunoblots demonstrating downregulation of STRA6 in SW620 cells. **f**) Top: secondary focus formation assays of SW620 stably expressing e.v. or STRA6-shRNA. Bottom: number of foci. Mean $\pm$ S.E.M. (n=3). \*\*p=0.0003 vs. e.v.-expressing cells. **g**) Quantitation of scratch assays in Fig. 3d. **h, i**) Quantitation of # of colonies (left panels) and colony sizes (right panels) in soft agar colony formation assays in Fig. 3e and 3j, respectively.

**Figure S3. a, b**) Immunoblots demonstrating downregulation of RBP in SW480 cells (**a**) and in NIH3T3-L1 adipocytes expressing RBPshRNA (**b**). (**c**) Scratch assay using SW480 cells treated with conditioned media from NIH3T3-L1 adipocytes that ectopically express e.v. or RBP-shRNA. Mean $\pm$ S.E.M. (n=3), \*p<0.02 vs e.v.- expressing cells. **d**) Immunoblot demonstrating ectopic expression of RBP (in SW480 cells. **e**) Immunoblots of phosphorylated STAT3 (pSTAT3) in MCF-7 cells treated with vehicle or 1  $\mu$ M holo-RBP for 15 min.

**Figure S4. a)** SW480 cells were transfected with an e.v. or with vectors encoding STRA6 or STRA6-Y643F. Cells were treated with 1  $\mu$ M holo-RBP for 4 h. and c-Fos mRNA expression was assessed by Q-PCR. Mean $\pm$ S.E.M. (n=3),\*p<0.05 vs. vehicle-treated cells, \*\*p<0.0001 vs. e.v.-expressing cells treated with holo-RBP. **b, c**) Levels of mRNA for denoted genes in SW480 cells expressing two different STRA6shRNAs (**b**) or RBPshRNAs (**c**). Mean $\pm$ S.E.M.

(n=3), \*p<0.01 vs. GFPshRNA-expressing cells. **d**) SW480 cells were pre-treated with 20 µg/ml cycloheximide and then treated with 1 µM holo-RBP for 4 h. Levels of denoted mRNAs were measured by Q-PCR. Mean±S.E.M. (n=3), \*p<0.05 vs. vehicle-treated cells. **e**) Immunoblots demonstrating reduced expression of STAT3 in HCT116 cells expressing STAT3-shRNA.

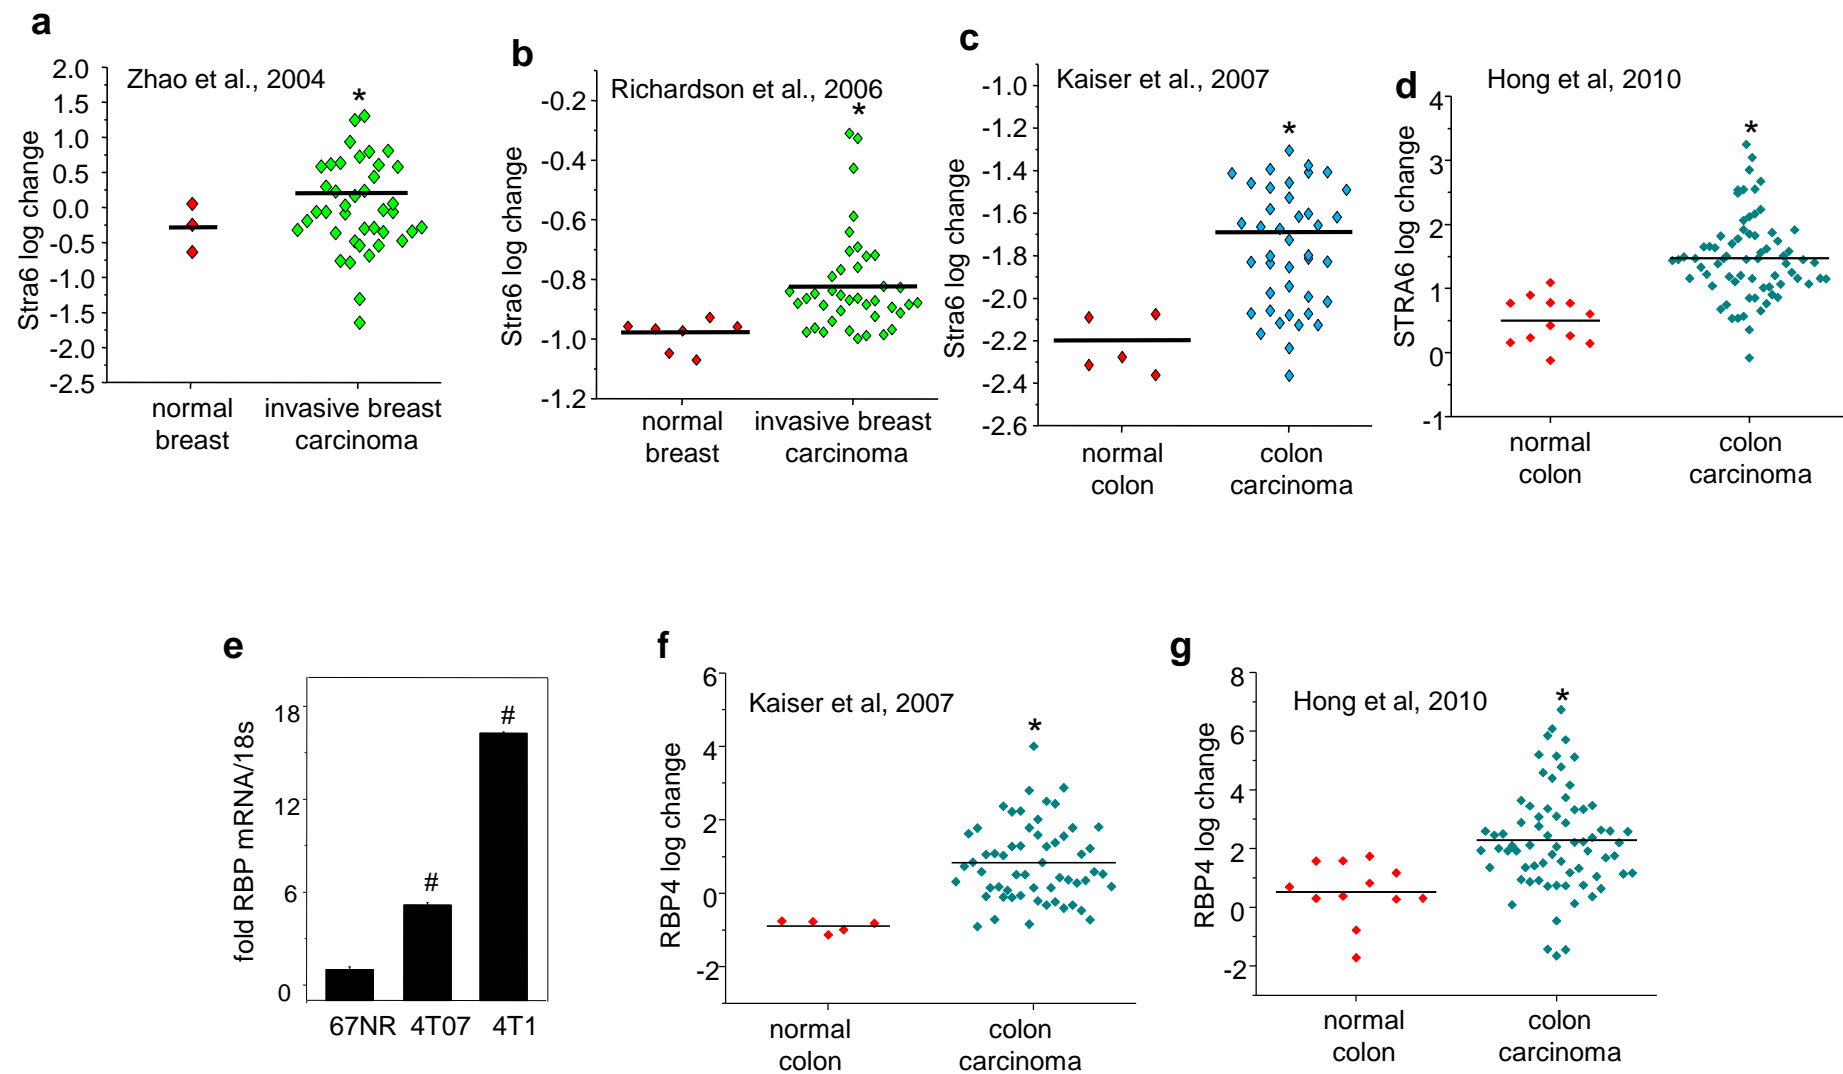

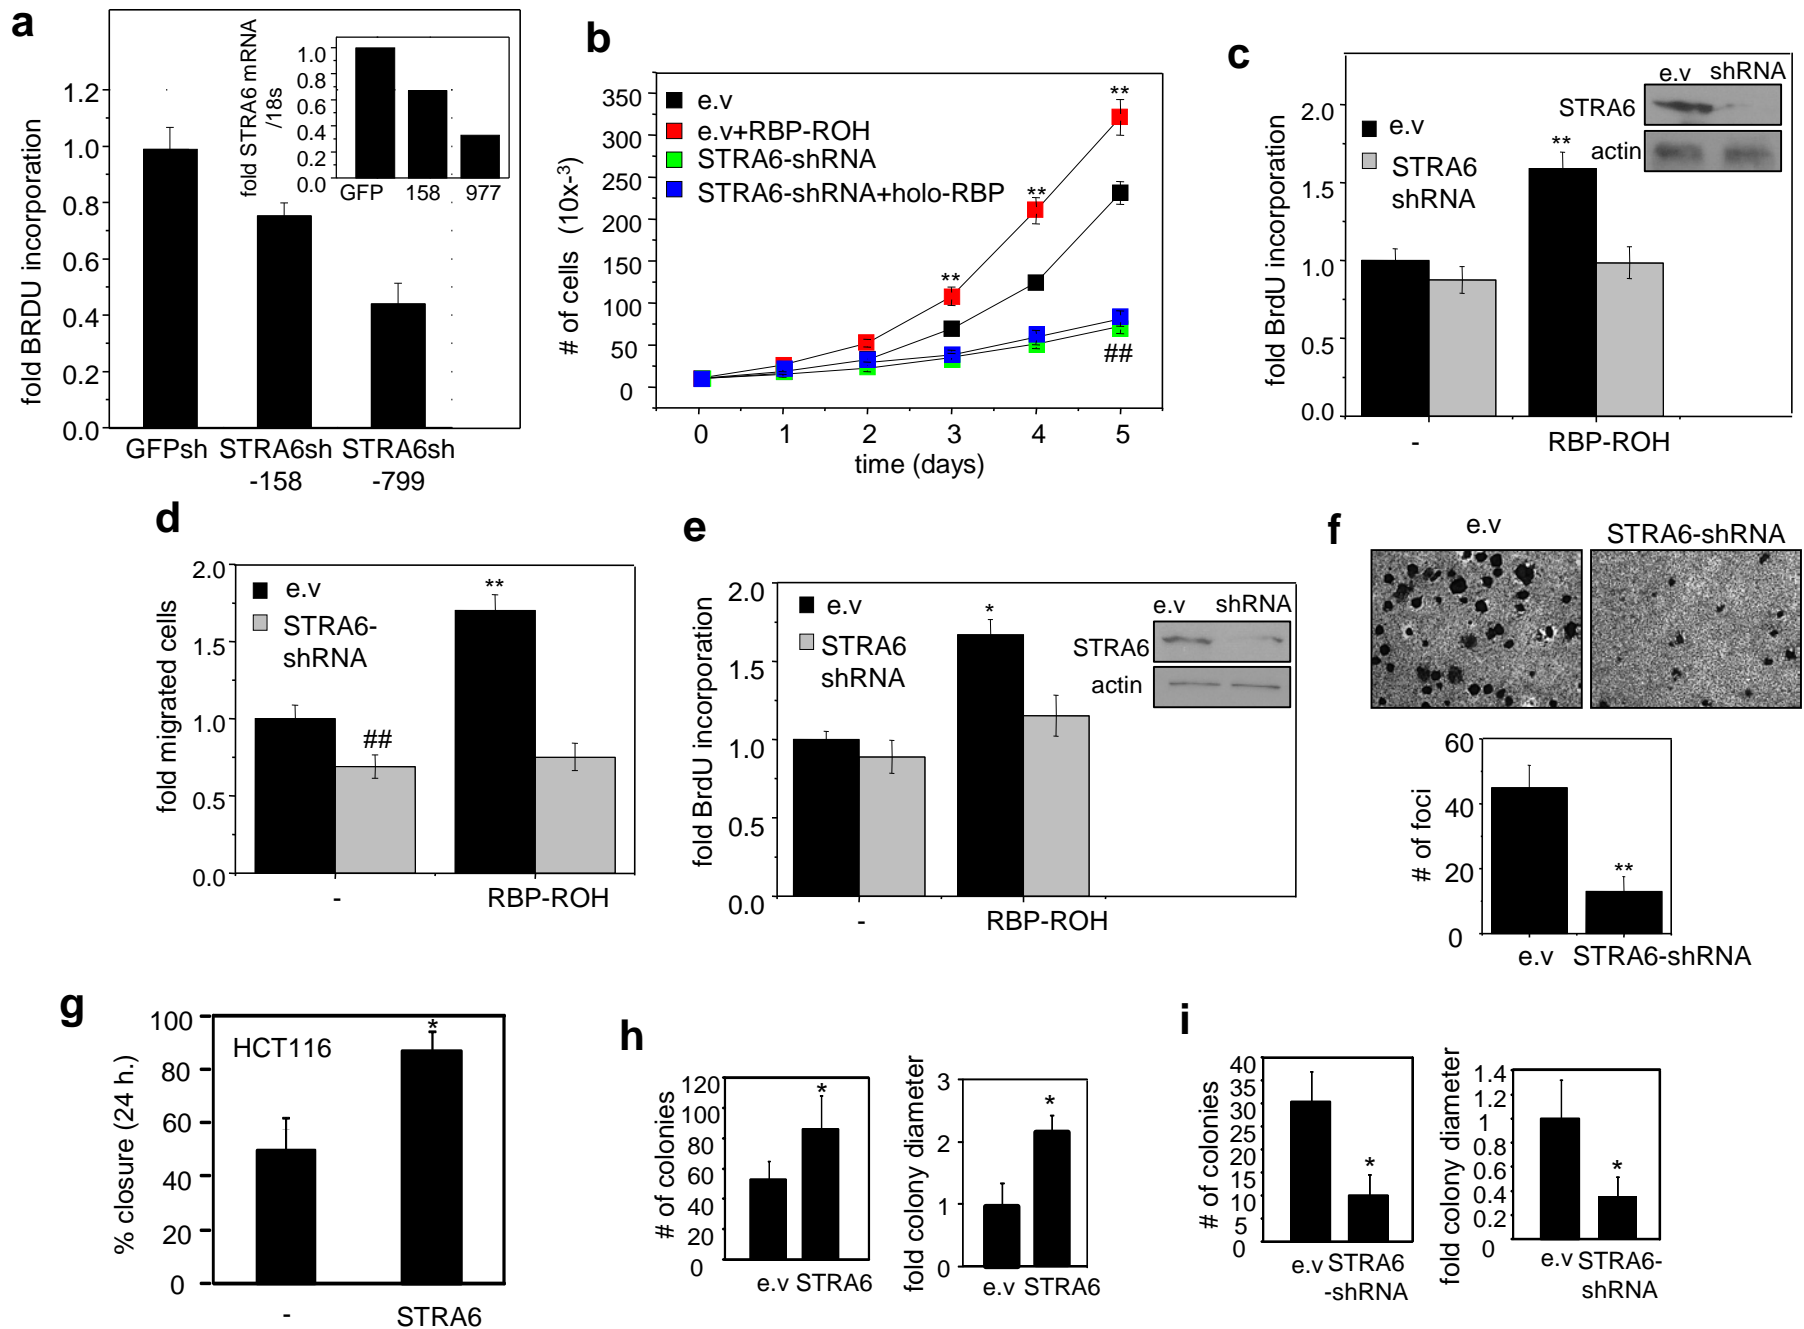

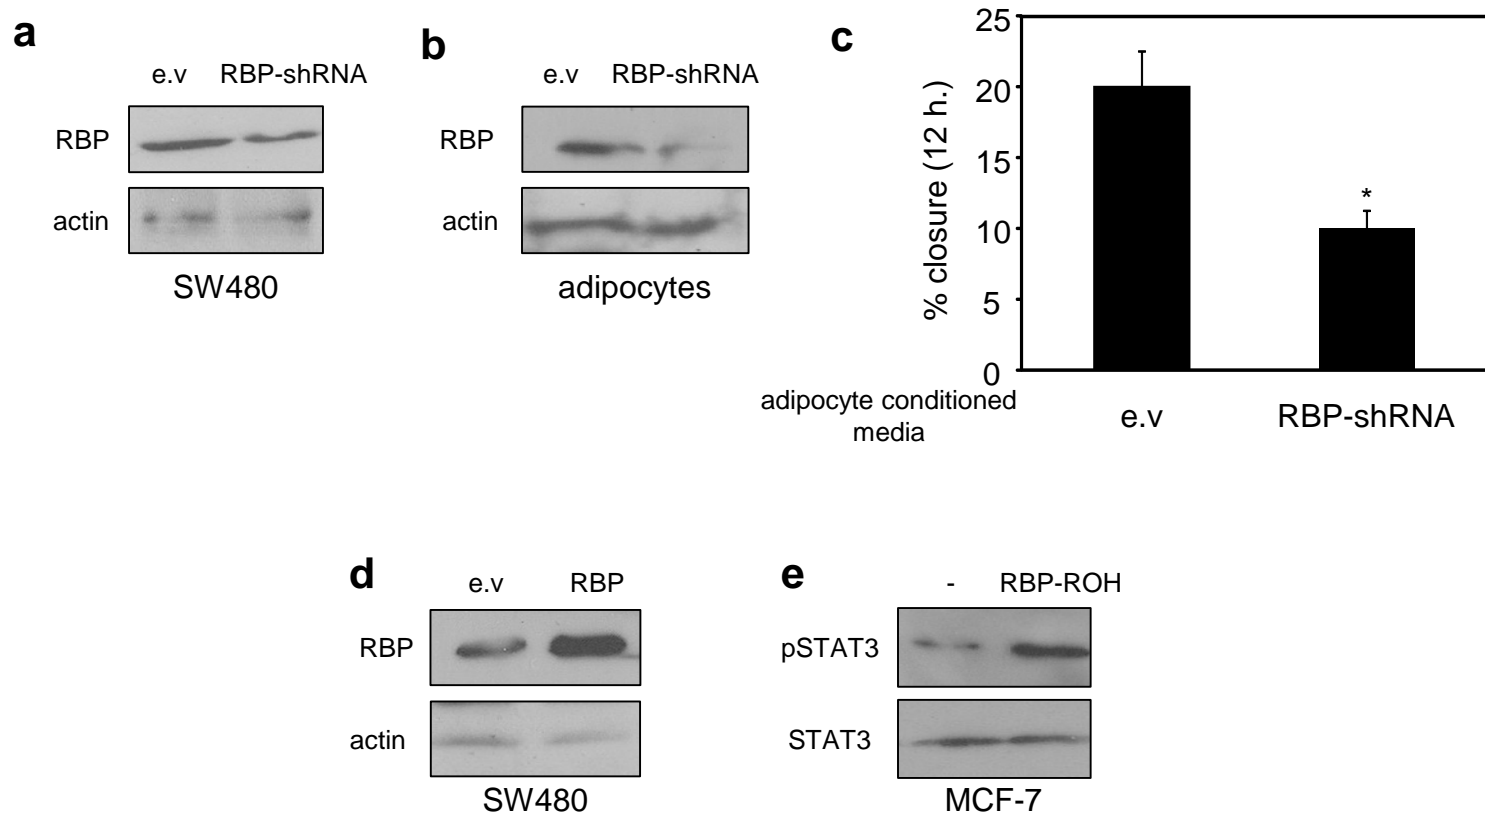

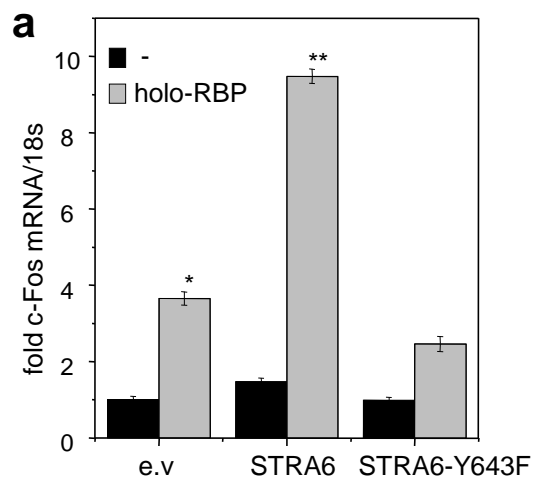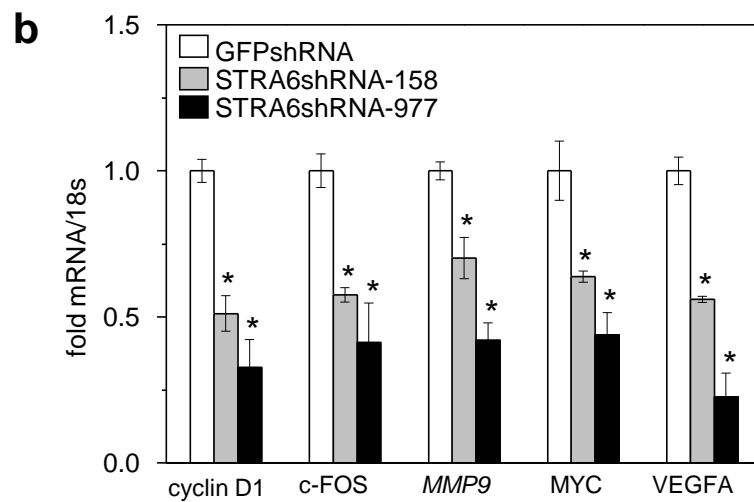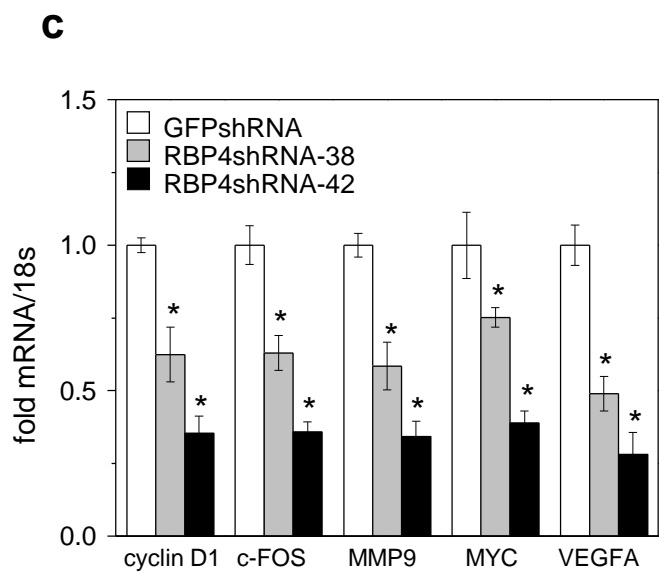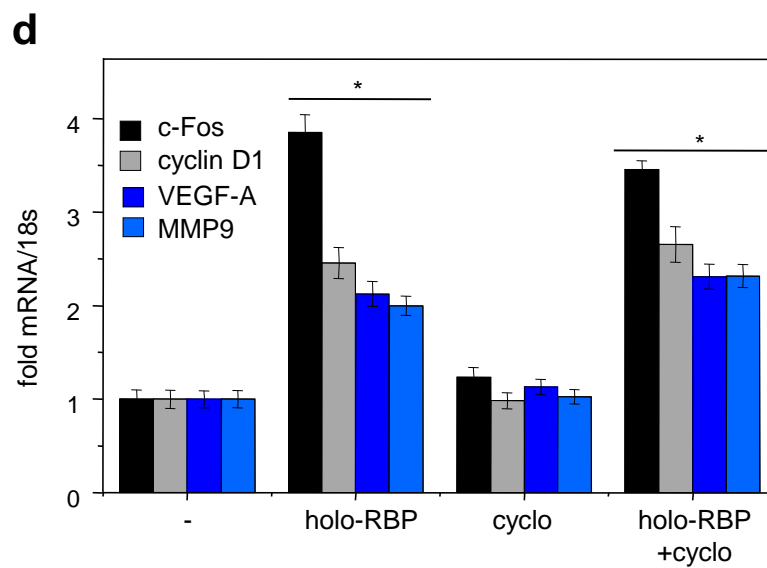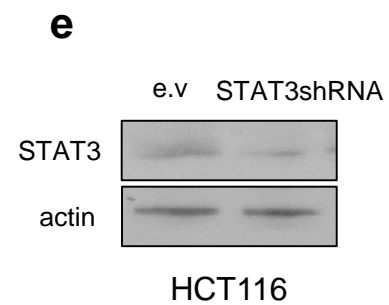

Supplement: NIHMS625824-supplement-1.pdf [file NIHMS625824-supplement-1.pdf]
